# Supplementary material for: Characterization of a novel role for the dynamin mechanoenzymes in the regulation of human sperm acrosomal exocytosis
Source: Oxford University Press journal article supplement (doi:10.1093/molehr/gax044), 2017-07-27
Supplement: gax044_MHR-17-0108-R1-supptable.docx [file gax044_MHR-17-0108-R1-supptable.docx]

Supplemental Table S1: Details of antibodies used throughout this study

| **Antibody** | **Final concentration1** | | | **Company** | **Catalogue No.** | **Batch No.** | **Concentration (stock)** |
| --- | --- | --- | --- | --- | --- | --- | --- |
| ***Primary antibodies*** | **IF** | **IB** | **EM** |  |  |  |  |
| **Dynamin 1** | 20 µg/ml | 1 µg/ml | NA | Abcam | ab108458 | GR107528-1 | 1 mg/ml |
| **Dynamin 2** | 4 µg/ml | NA | 2 µg/ml | Santa Cruz | sc-6400 | #L0712 | 0.2 mg/ml |
| **Dynamin 2** | NA | 0.27 µg/ml | NA | Thermo | PA5-19800 | #QK2113152 | 0.27 mg/ml |
| **Dynamin 3** | 3 µg/ml | 0.15 µg/ml | NA | Proteintech | 14737-1-AP | NA | 0.15 mg/ml |
| **Dynamin pSer778** | 57.8 µg/ml | 5.78 µg/ml | NA | Thermo | PA1-4621 | QJ2096151 | 5.78 mg/ml |
| **CDC2 (CDK1)** | 4 µg/ml | NA | NA | Santa Cruz | sc-54 | K1915 | 0.2 mg/ml |
| **CDK5** | 4 µg/ml | NA | NA | Santa Cruz | sc-173 | A2513 | 0.2 mg/ml |
| **IZUMO1** | 4 µg/ml | NA | NA | Santa Cruz | sc-79543 | #B1309 | 0.2 mg/ml |
| **α-Tubulin** | NA | 1.9 µg/ml | NA | Sigma | T5168 | 103M4773V | 5.7 mg/ml |
| ***Secondary antibodies*** |  |  |  |  |  |  |  |
| **Anti rabbit Alexa Fluor 594** | 5 µg/ml | NA | NA | Thermo | A11012 | 1608464 | 2 mg/ml |
| **Anti rabbit Alexa Fluor 488** | 5 µg/ml | NA | NA | Thermo | A11008 | 1678787 | 2 mg/ml |
| **Anti goat Alexa Fluor 594** | 5 µg/ml | NA | NA | Thermo | A11058 | 1180089 | 2 mg/ml |
| **Anti sheep Alexa Fluor 488** | 5 µg/ml | NA | NA | Thermo | A11015 | 1567206 | 2 mg/ml |
| **Anti mouse Alexa Fluor 594** | 5 µg/ml | NA | NA | Thermo | A11005 | 1219862 | 2 mg/ml |
| **Anti rabbit HRP** | NA | 0.13 µg/ml | NA | Millipore | DC03L | NA | 0.13 mg/ml |
| **Anti mouse HRP** | NA | 0.1 µg/ml | NA | Santa Cruz | sc-2005 | B1616 | 0.4 mg/ml |
| **Anti sheep HRP** | NA | 2 µg/ml | NA | Abcam | Ab6747 | GR238704-1 | 2 mg/ml |
| **Gold label anti Goat 10 nm** | NA | NA | NA | Sigma | G5402 | SLBP7446V | NA |
| **PLA probe anti-Mouse PLUS** | NA | NA | NA | Sigma | PUO92001 | A43902/1 | NA |
| **PLA probe anti-Goat MINUS** | NA | NA | NA | Sigma | PUO92006 | A43108/1 | NA |
| **PLA probe anti-Rabbit PLUS** | NA | NA | NA | Sigma | PUO92002 | A51303/1 | NA |
| **PLA probe anti-Mouse MINUS** | NA | NA | NA | Sigma | PUO92004 | A32705 | NA |

1 IF, immunofluorescence; IB, immunoblot; EM, electron microscopy, NA, not applicable / not available
